# Supplementary material
Source: PubMed Central journal article supplement (PMC3423981)

Supporting Information for

Synthesis of Tetrazolo-Fused Benzodiazepines and Benzodiazepinones by a Two-  
Step Protocol Using an Ugi-Azide Reaction for Initial Diversity Generation

*Steven Gunawan<sup>a</sup>, Muhammad Ayaz<sup>a</sup>, Fabio De Moliner<sup>a</sup>, Brendan Frett<sup>a</sup>, Christine Kaiser<sup>a</sup>,*

*Nina Patrick<sup>a</sup>, Zhigang Xu<sup>a</sup> and Christopher Hulme\*<sup>a</sup>*

<sup>a</sup> College of Pharmacy, BIO5 Oro Valley, The University of Arizona, 1580 E. Hanley Blvd., Oro Valley,  
AZ 85737 USA

|                                                   |     |
|---------------------------------------------------|-----|
| <sup>1</sup> H NMR for compound <b>8a</b> .....   | S2  |
| <sup>13</sup> C NMR for compound <b>8a</b> .....  | S3  |
| <sup>1</sup> H NMR for compound <b>8b</b> .....   | S4  |
| <sup>13</sup> C NMR for compound <b>8b</b> .....  | S5  |
| <sup>1</sup> H NMR for compound <b>8c</b> .....   | S6  |
| <sup>13</sup> C NMR for compound <b>8c</b> .....  | S7  |
| <sup>1</sup> H NMR for compound <b>8d</b> .....   | S8  |
| <sup>13</sup> C NMR for compound <b>8d</b> .....  | S9  |
| <sup>1</sup> H NMR for compound <b>8e</b> .....   | S10 |
| <sup>13</sup> C NMR for compound <b>8e</b> .....  | S11 |
| <sup>1</sup> H NMR for compound <b>10a</b> .....  | S12 |
| <sup>13</sup> C NMR for compound <b>10a</b> ..... | S13 |
| <sup>1</sup> H NMR for compound <b>10b</b> .....  | S14 |
| <sup>13</sup> C NMR for compound <b>10b</b> ..... | S15 |
| <sup>1</sup> H NMR for compound <b>10c</b> .....  | S16 |
| <sup>13</sup> C NMR for compound <b>10c</b> ..... | S17 |
| <sup>1</sup> H NMR for compound <b>10d</b> .....  | S18 |
| <sup>13</sup> C NMR for compound <b>10d</b> ..... | S19 |
| <sup>1</sup> H NMR for compound <b>10e</b> .....  | S20 |
| <sup>13</sup> C NMR for compound <b>10e</b> ..... | S21 |
| <sup>1</sup> H NMR for compound <b>11a</b> .....  | S22 |
| <sup>13</sup> C NMR for compound <b>11a</b> ..... | S23 |
| <sup>1</sup> H NMR for compound <b>11b</b> .....  | S24 |
| <sup>13</sup> C NMR for compound <b>11b</b> ..... | S25 |
| <sup>1</sup> H NMR for compound <b>11c</b> .....  | S26 |
| <sup>13</sup> C NMR for compound <b>11c</b> ..... | S27 |
| <sup>1</sup> H NMR for compound <b>11d</b> .....  | S28 |
| <sup>13</sup> C NMR for compound <b>11d</b> ..... | S29 |

$^1\text{H}$  NMR for compound **8a** ( $\text{CDCl}_3$ , 400 MHz)

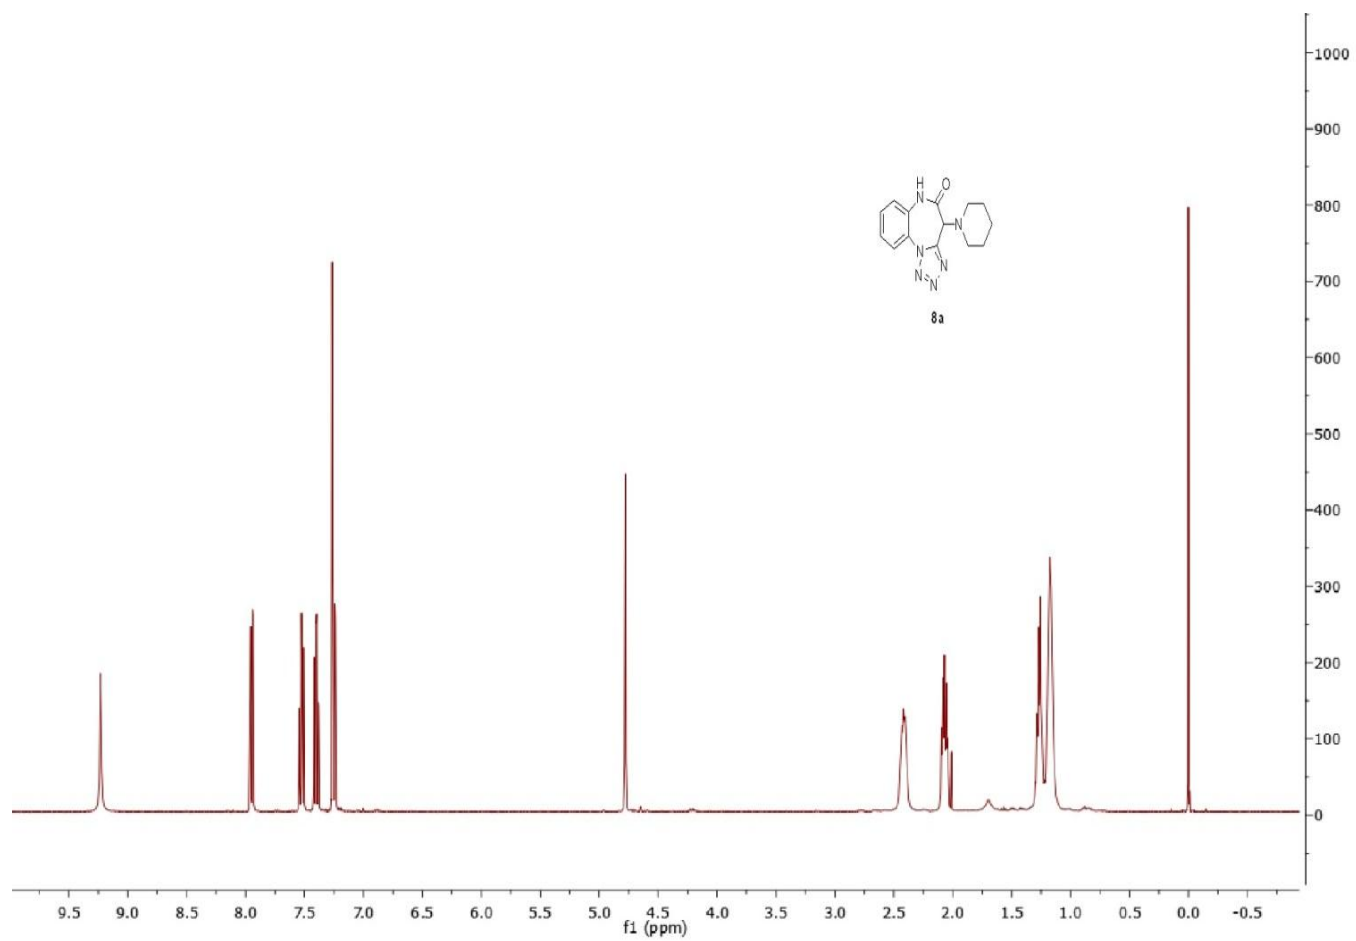

$^{13}\text{C}$  NMR for compound **8a** ( $\text{CDCl}_3$ , 100 MHz)

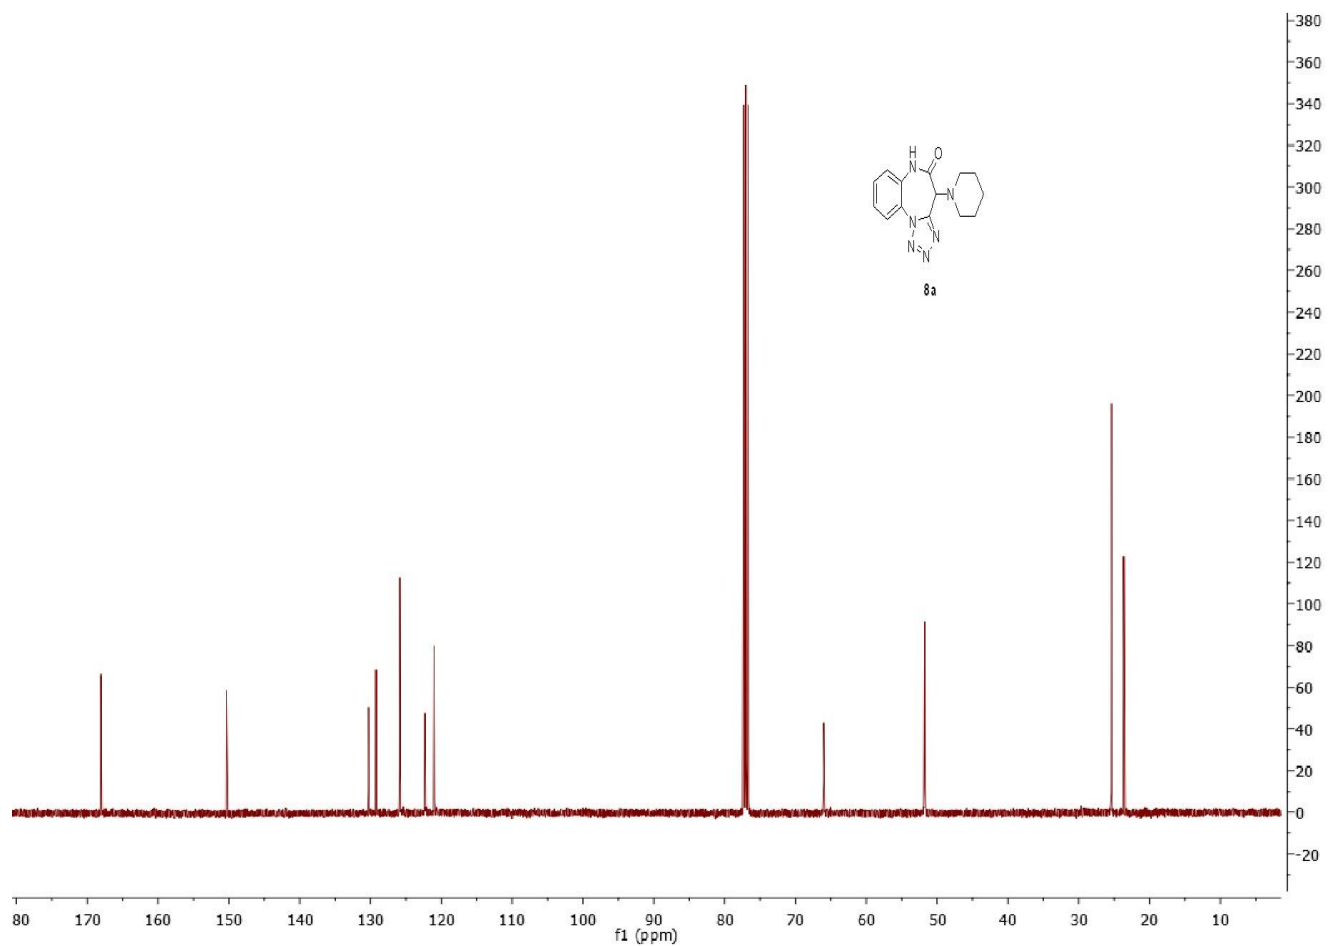

$^1\text{H}$  NMR for compound **8b** ( $\text{CDCl}_3$ , 400 MHz)

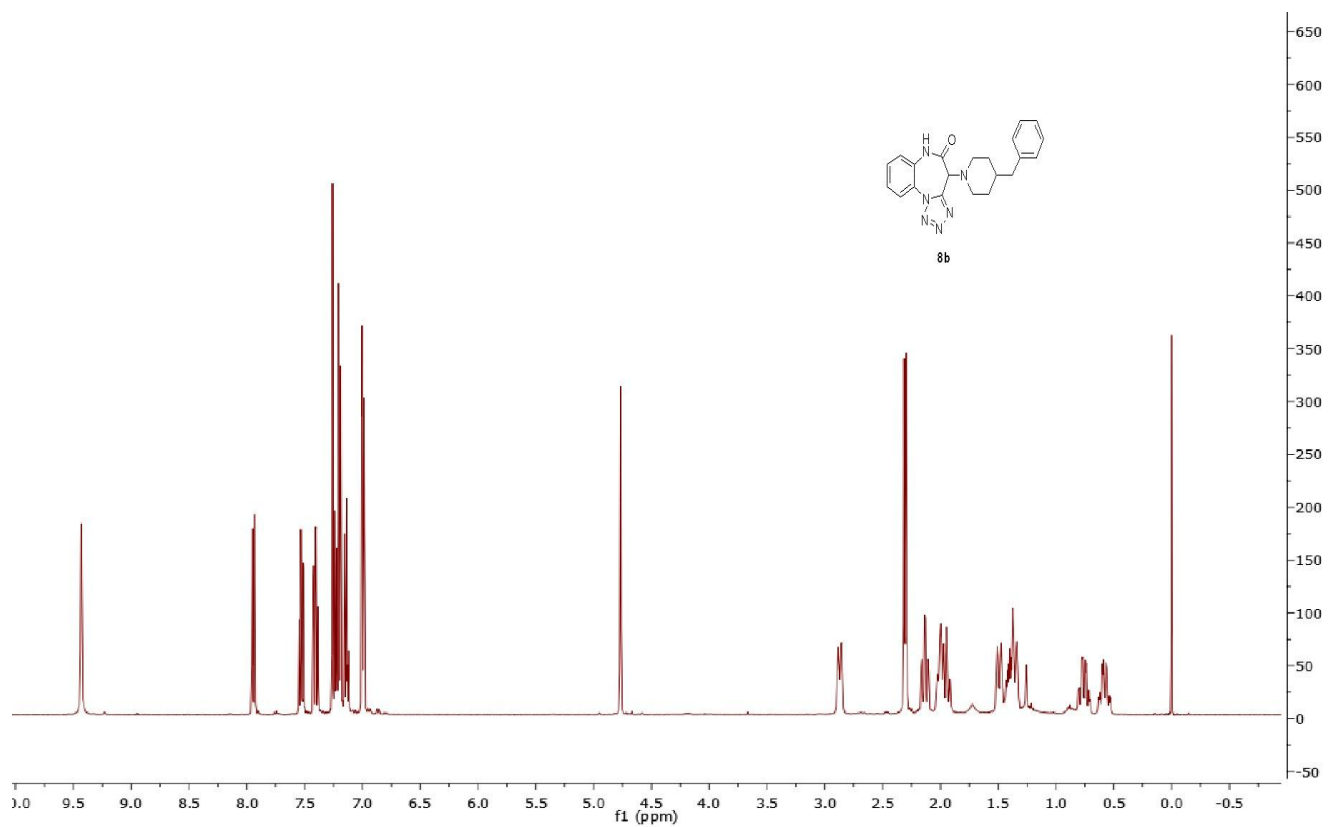

$^{13}\text{C}$  NMR for compound **8b** ( $\text{CDCl}_3$ , 100 MHz)

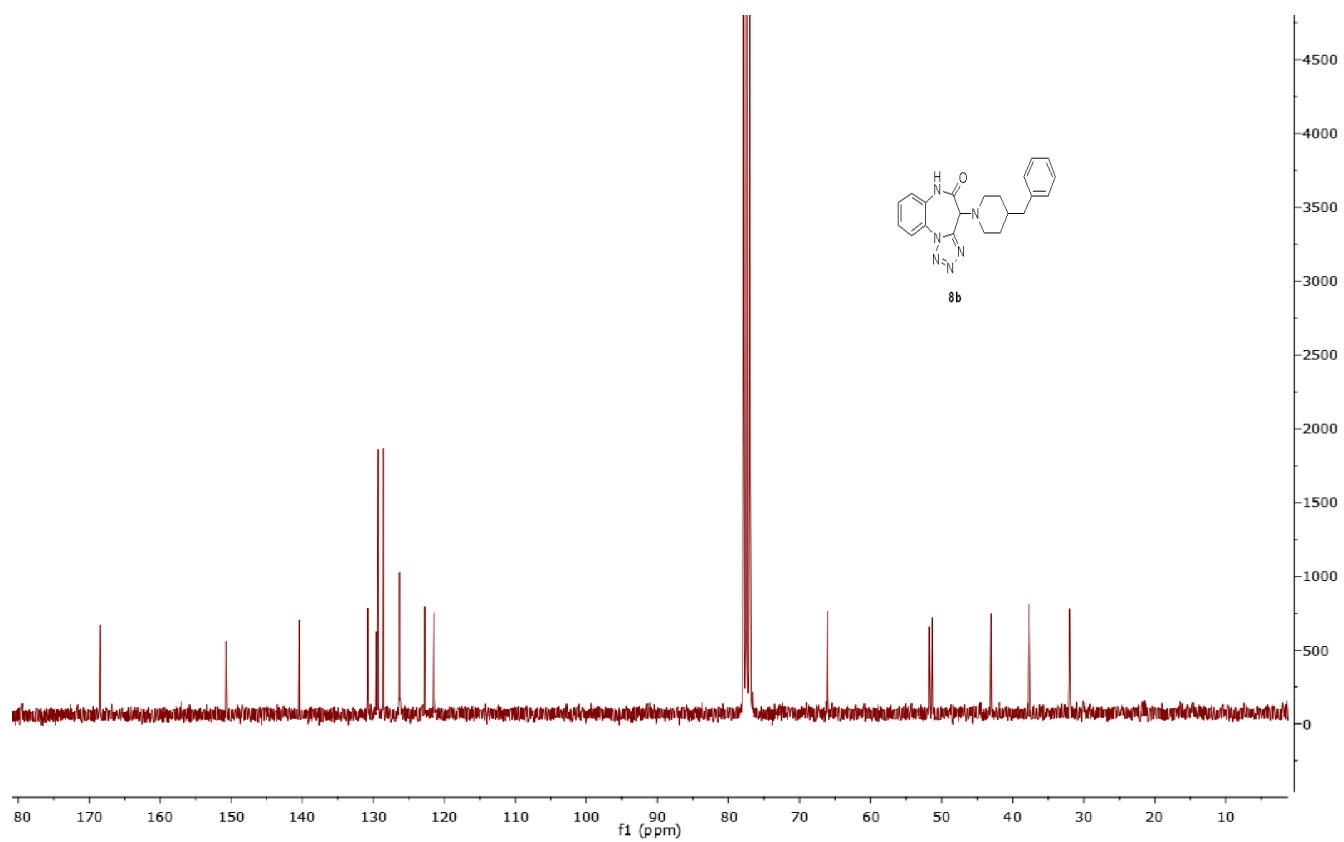

$^1\text{H}$  NMR for compound **8c** ( $\text{CDCl}_3$ , 400 MHz)

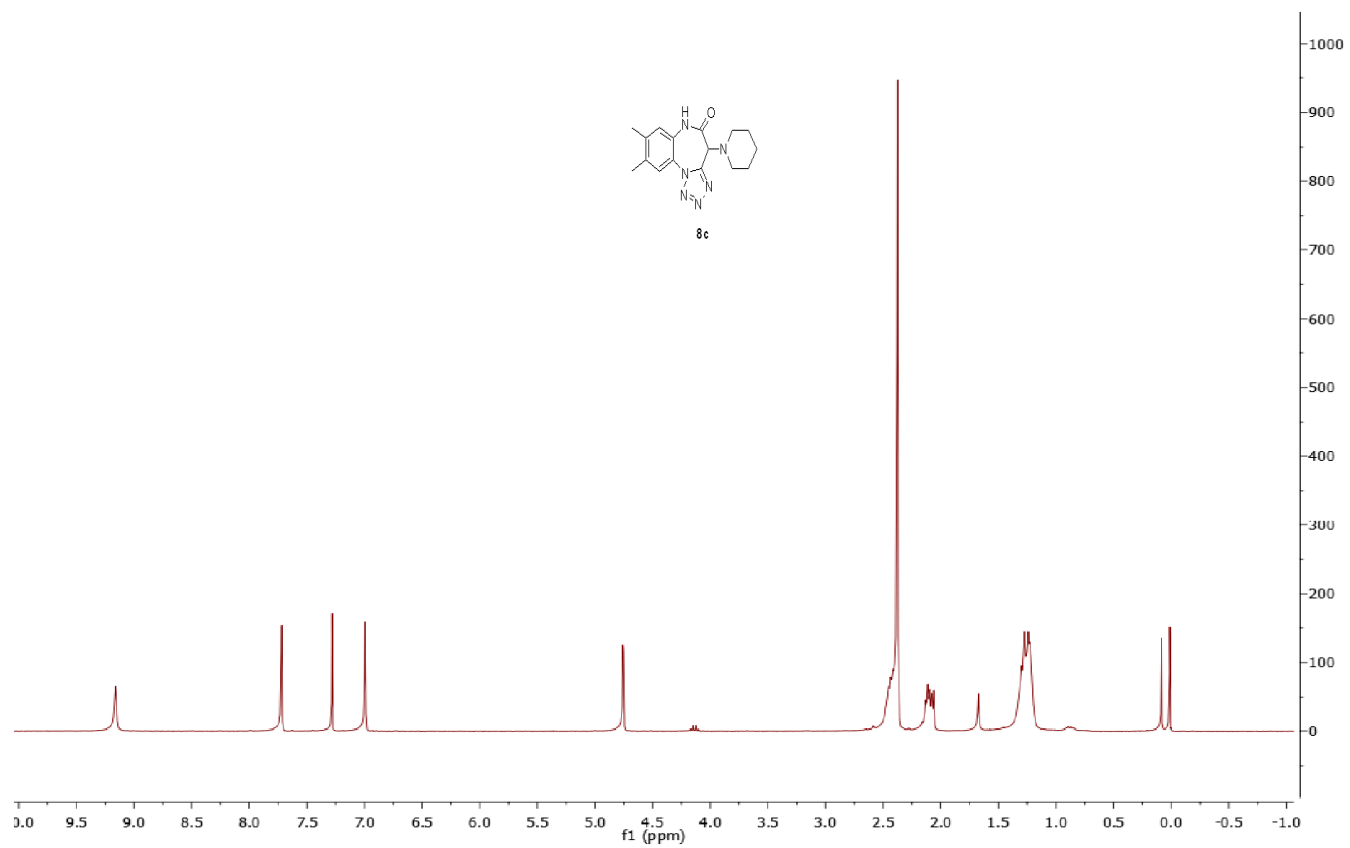

$^{13}\text{C}$  NMR for compound **8c** ( $\text{CDCl}_3$ , 100 MHz)

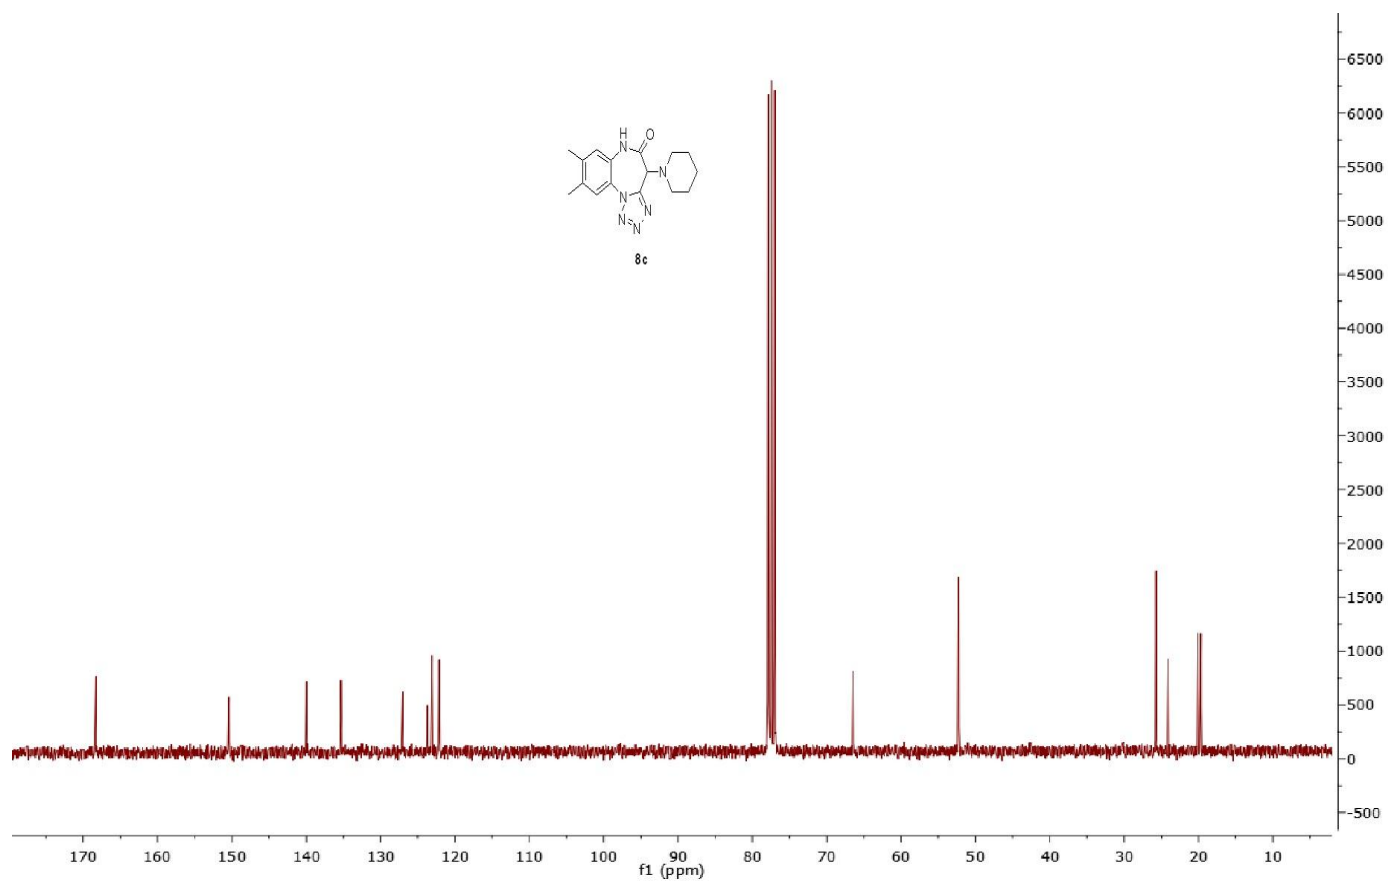

$^1\text{H}$  NMR for compound **8d** ( $\text{CDCl}_3$ , 400 MHz)

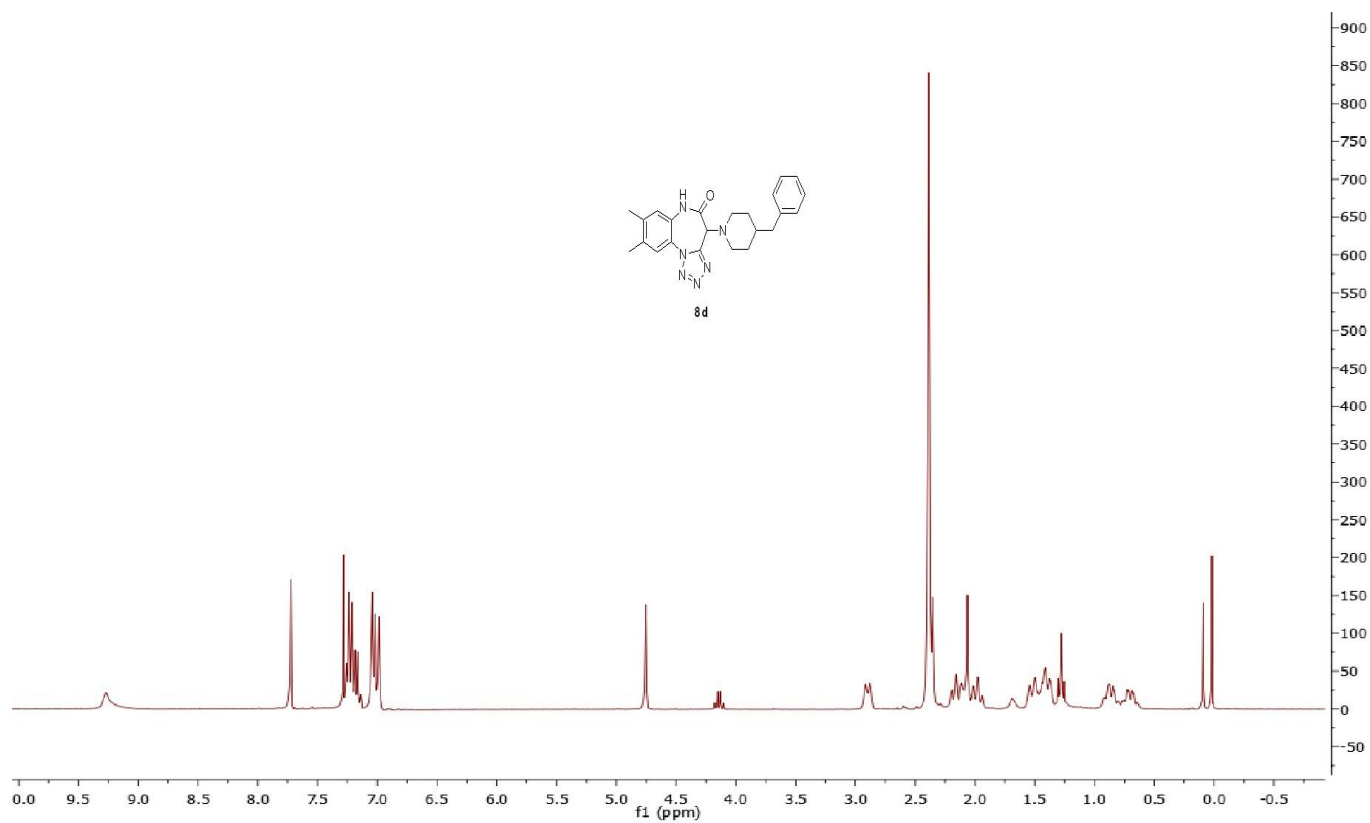



$^{13}\text{C}$  NMR for compound **8d** ( $\text{CDCl}_3$ , 100 MHz)

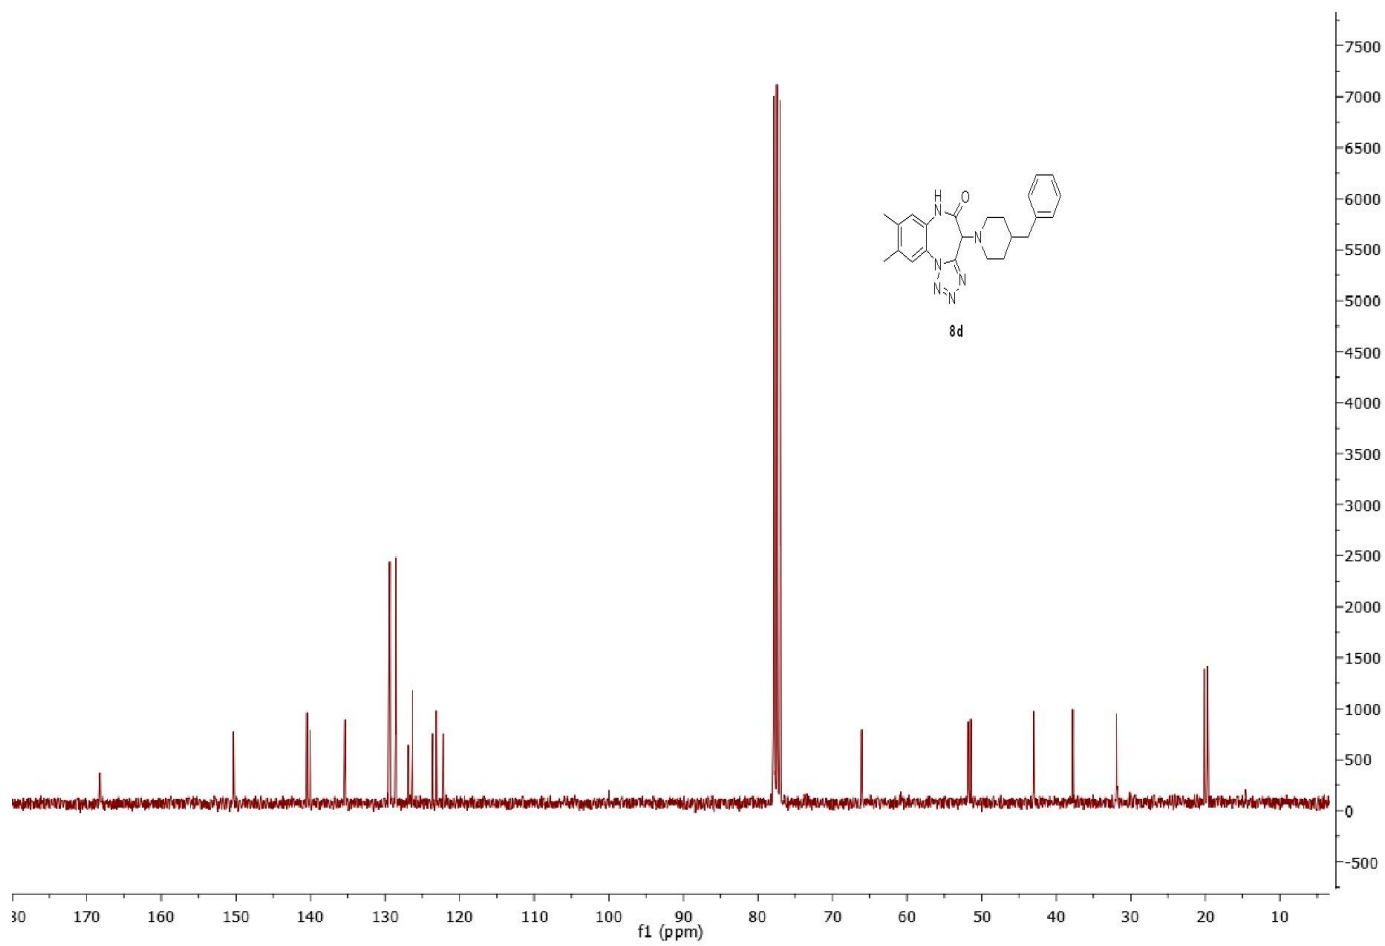

$^1\text{H}$  NMR for compound **8e** ( $\text{CDCl}_3$ , 400 MHz)

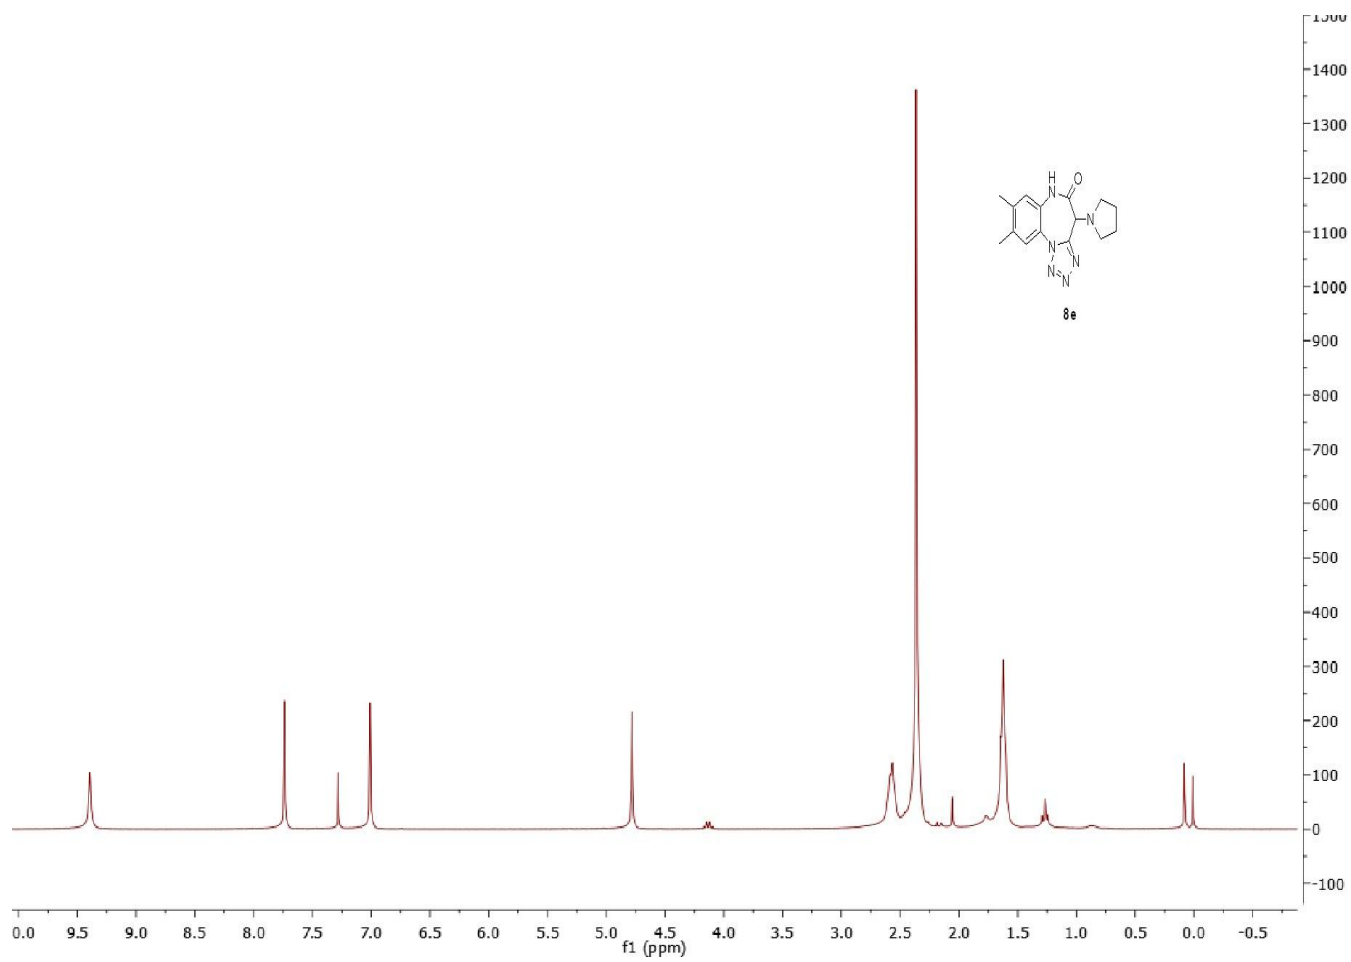

$^{13}\text{C}$  NMR for compound **8e** ( $\text{CDCl}_3$ , 100 MHz)

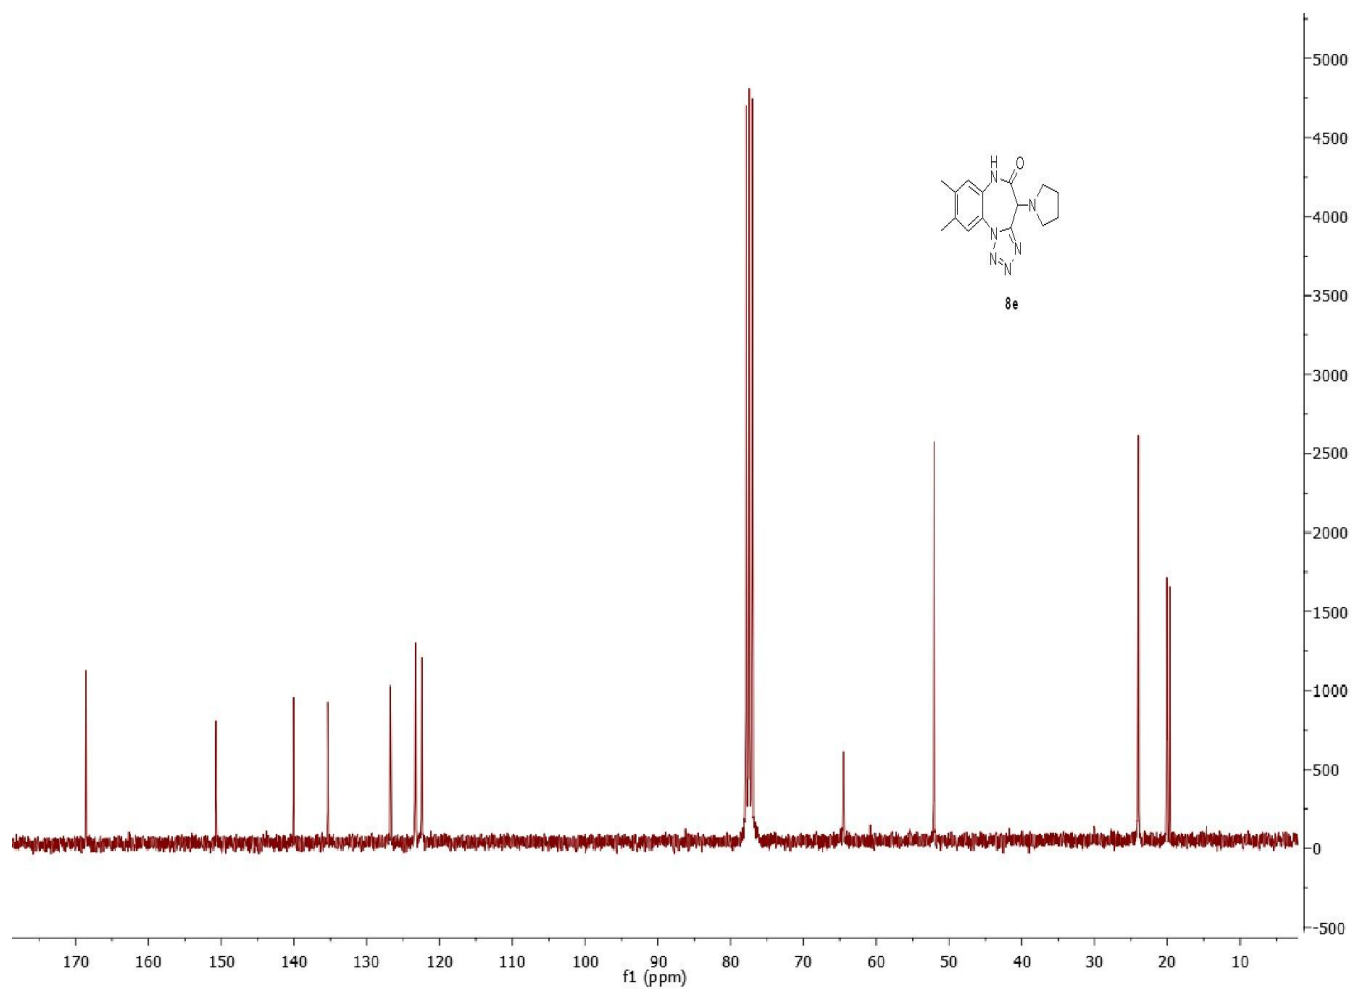

$^1\text{H}$  NMR for compound **10a** ( $\text{CDCl}_3$ , 400 MHz)

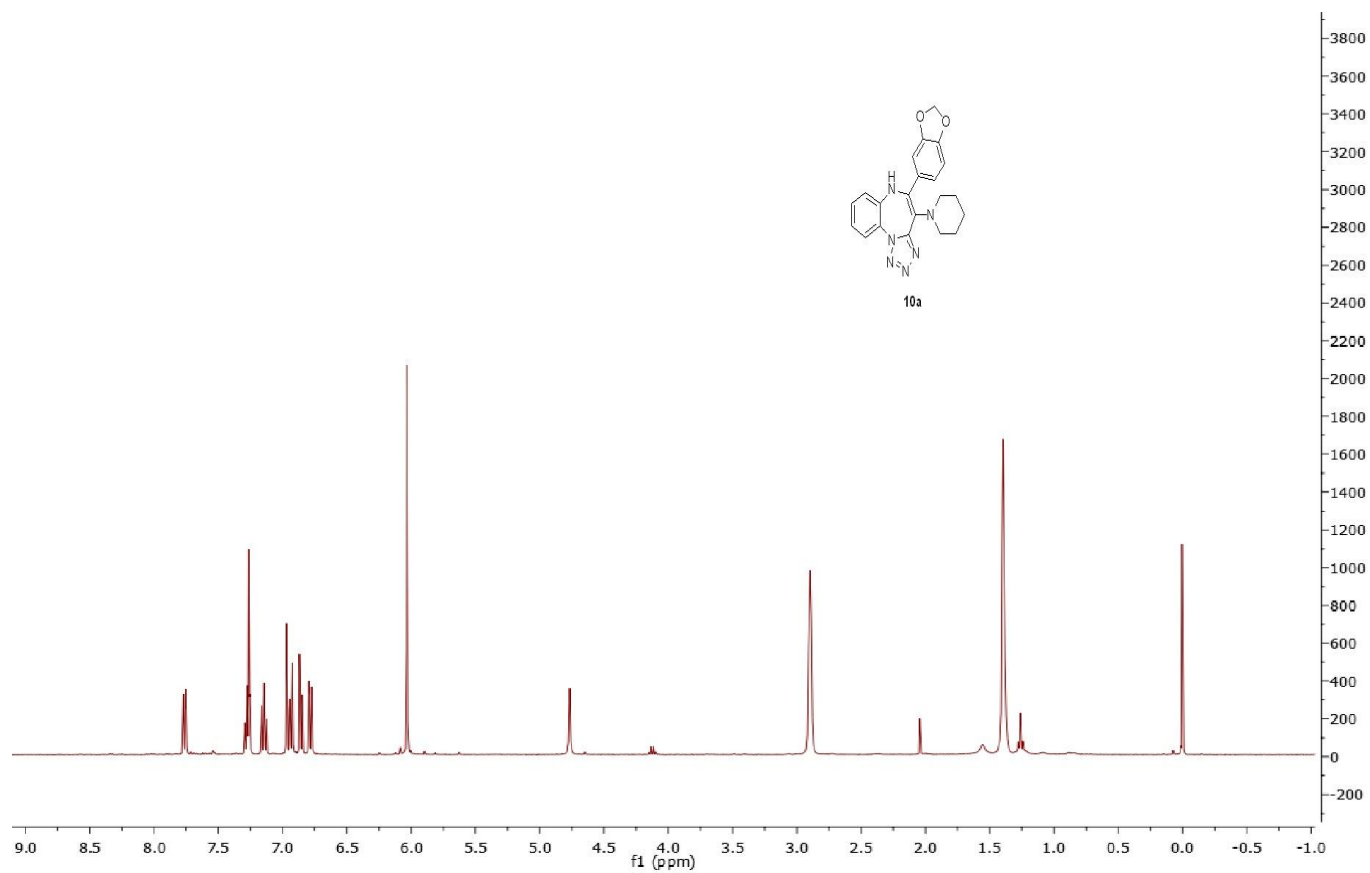

$^{13}\text{C}$  NMR for compound **10a** ( $\text{CDCl}_3$ , 100 MHz)

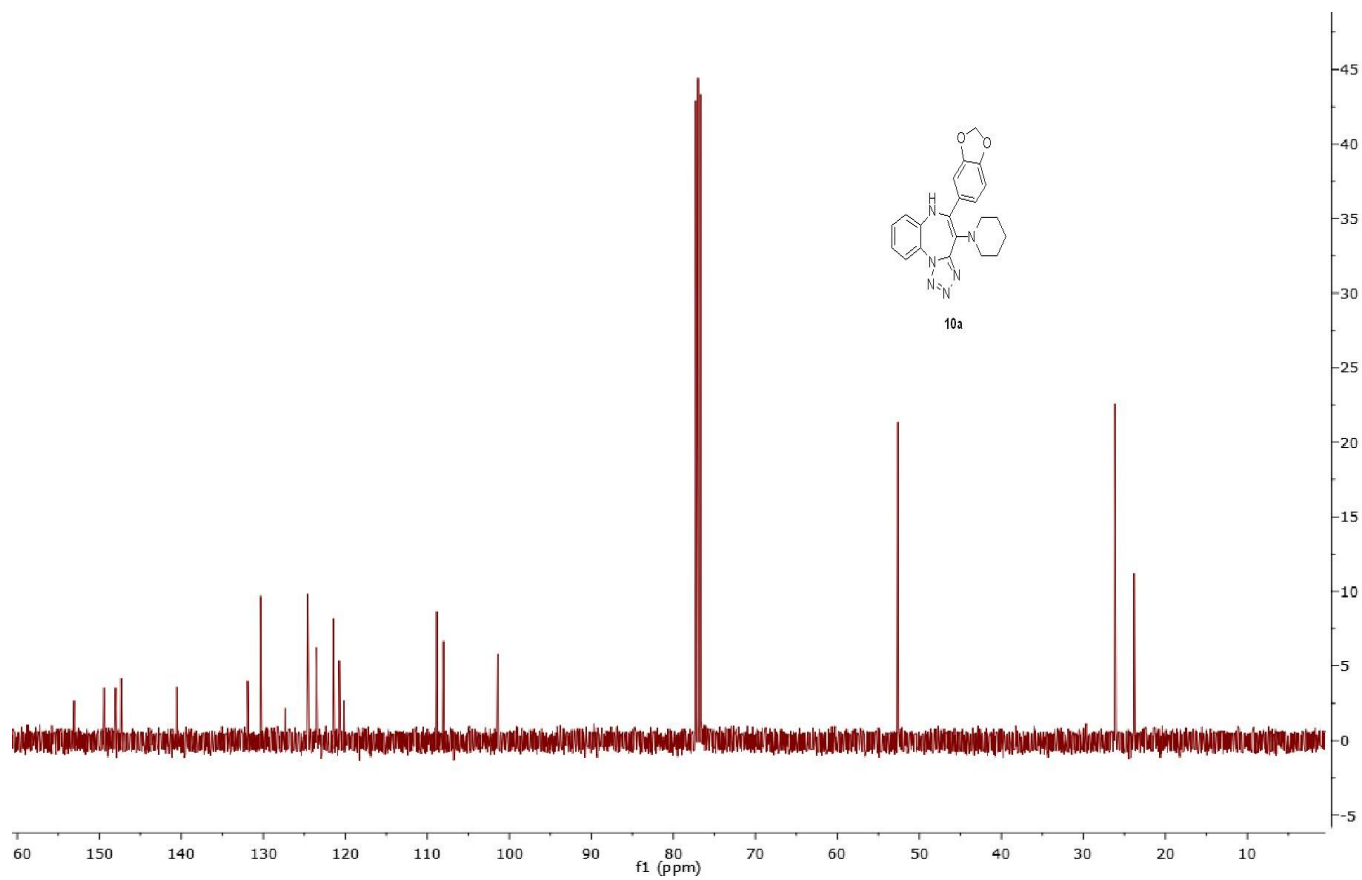

$^1\text{H}$  NMR for compound **10b** ( $\text{CDCl}_3$ , 400 MHz)

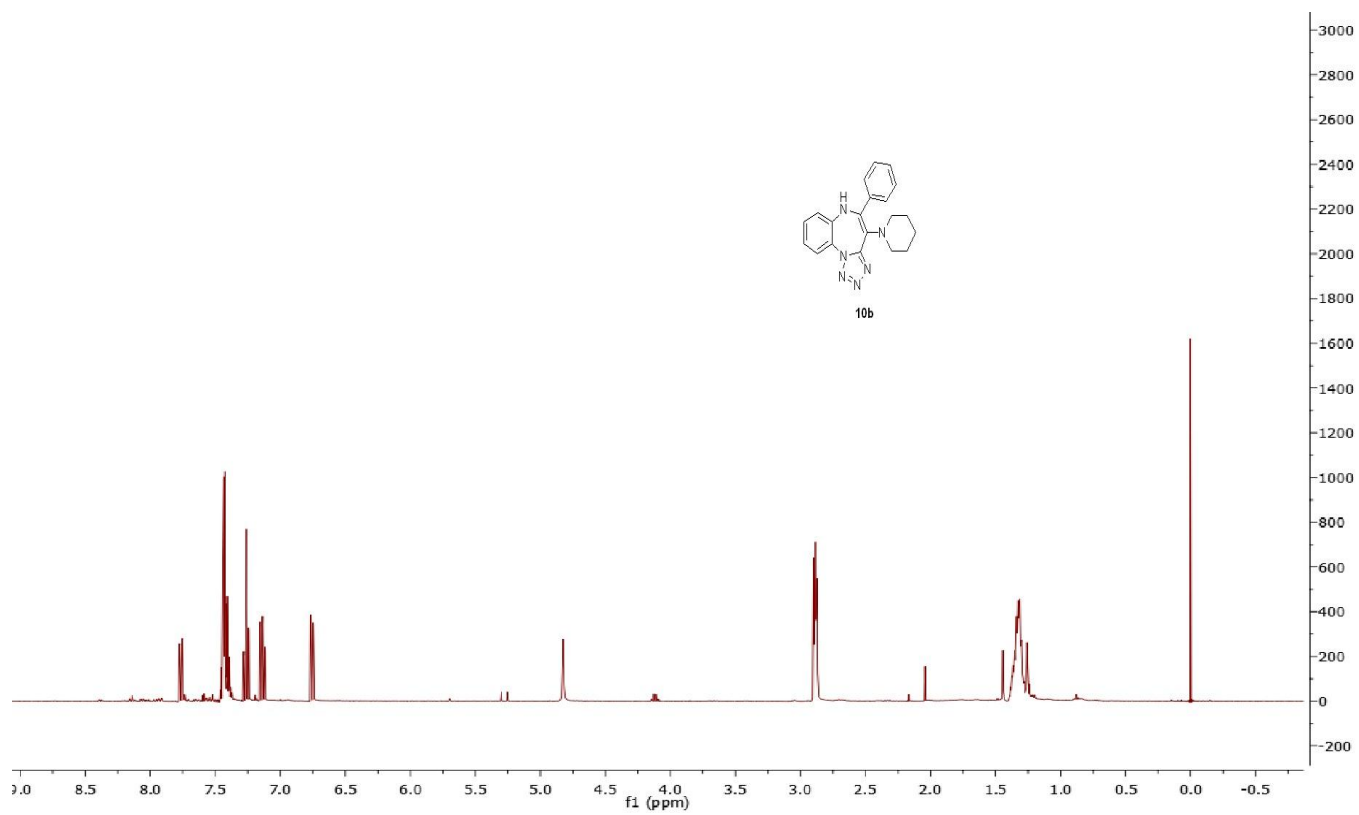

$^{13}\text{C}$  NMR for compound **10b** ( $\text{CDCl}_3$ , 100 MHz)

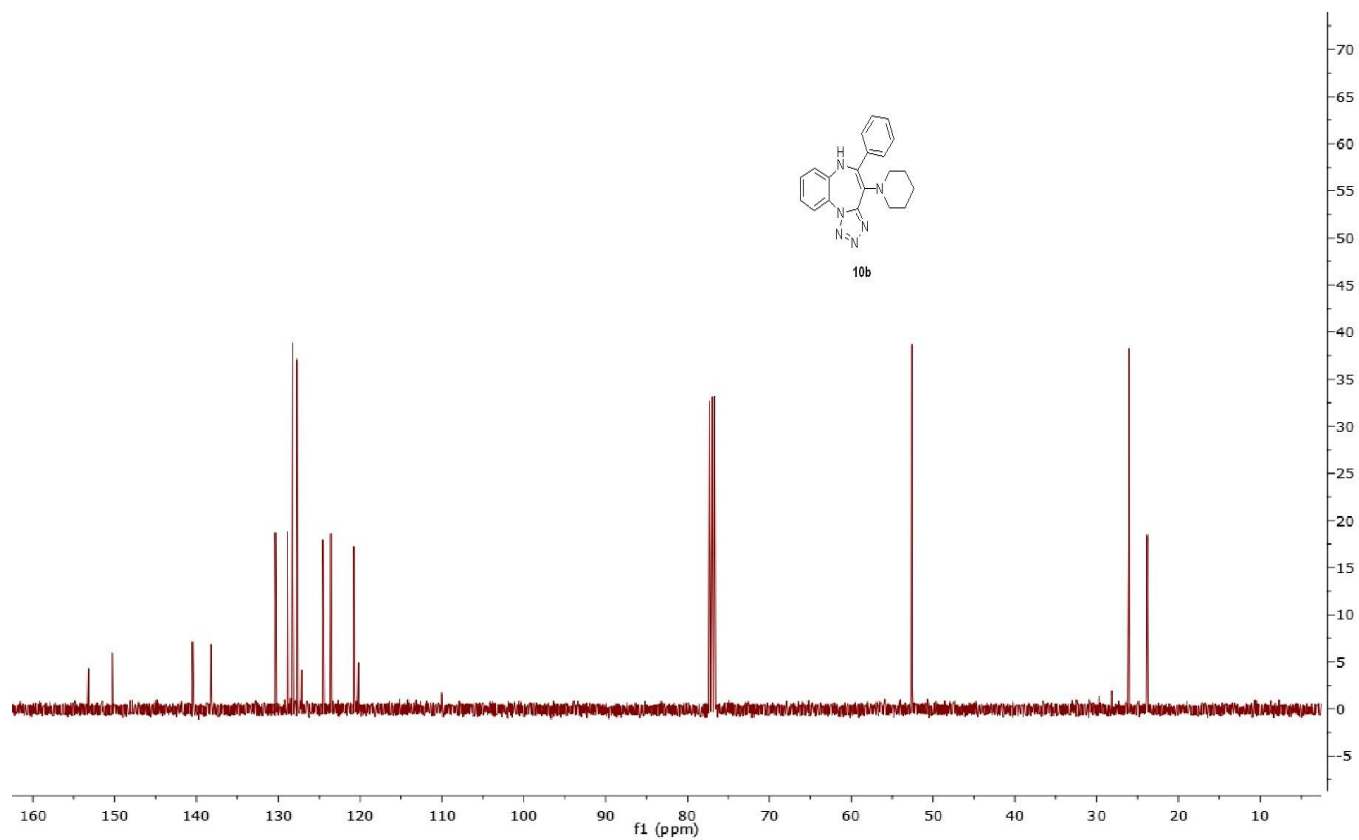

$^1\text{H}$  NMR for compound **10c** ( $\text{CDCl}_3$ , 400 MHz)

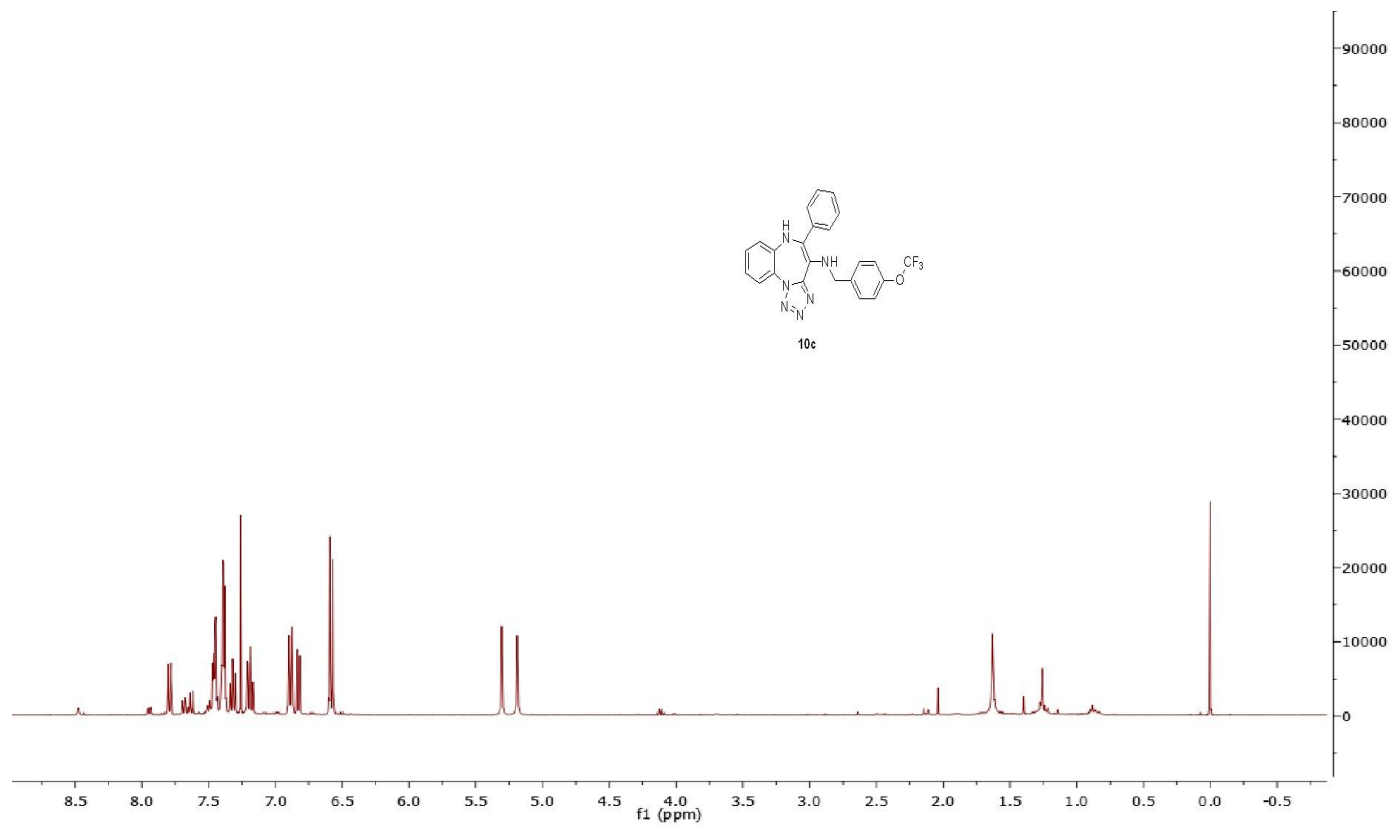



$^{13}\text{C}$  NMR for compound **10c** ( $\text{CDCl}_3$ , 100 MHz)

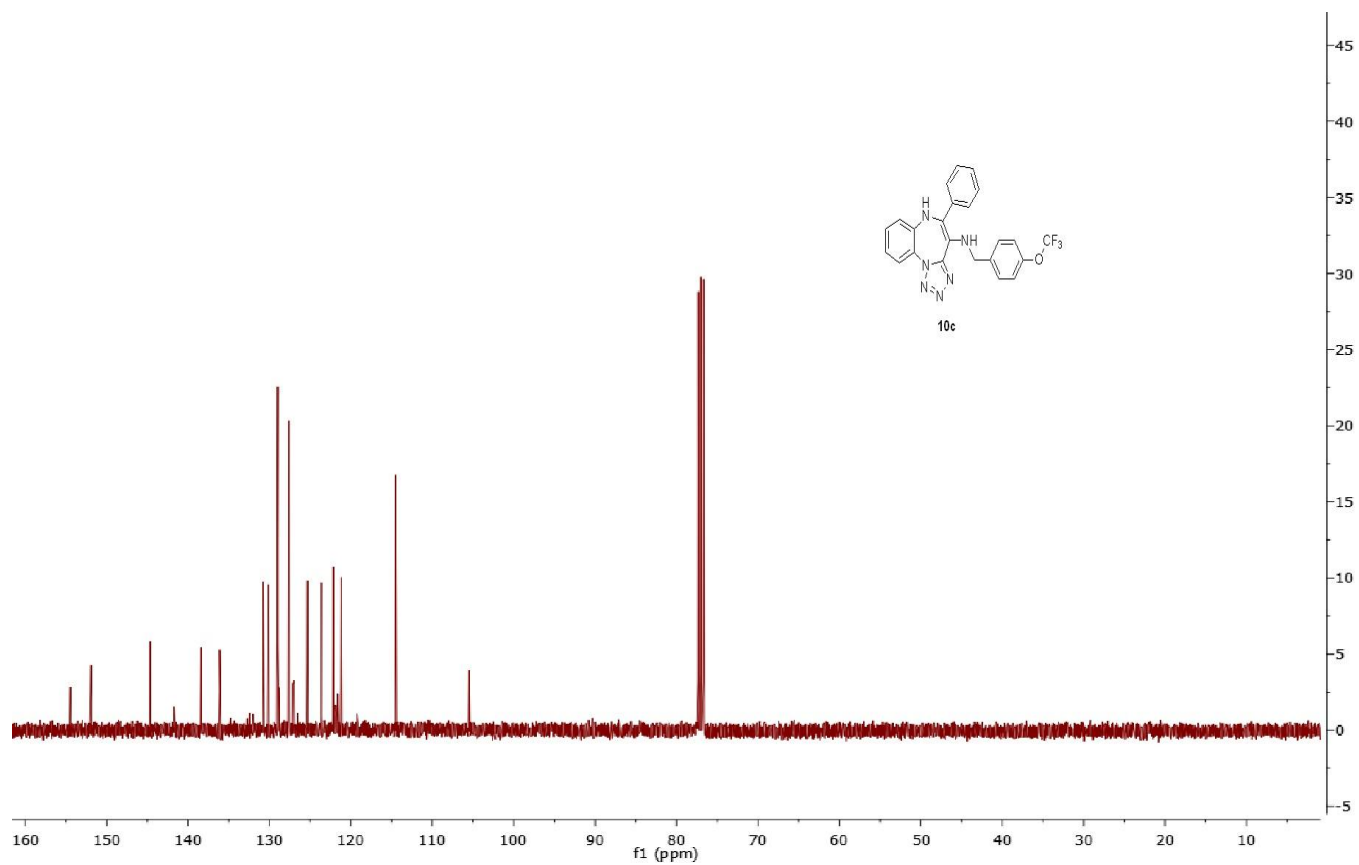

$^1\text{H}$  NMR for compound **10d** ( $\text{CDCl}_3$ , 400 MHz)

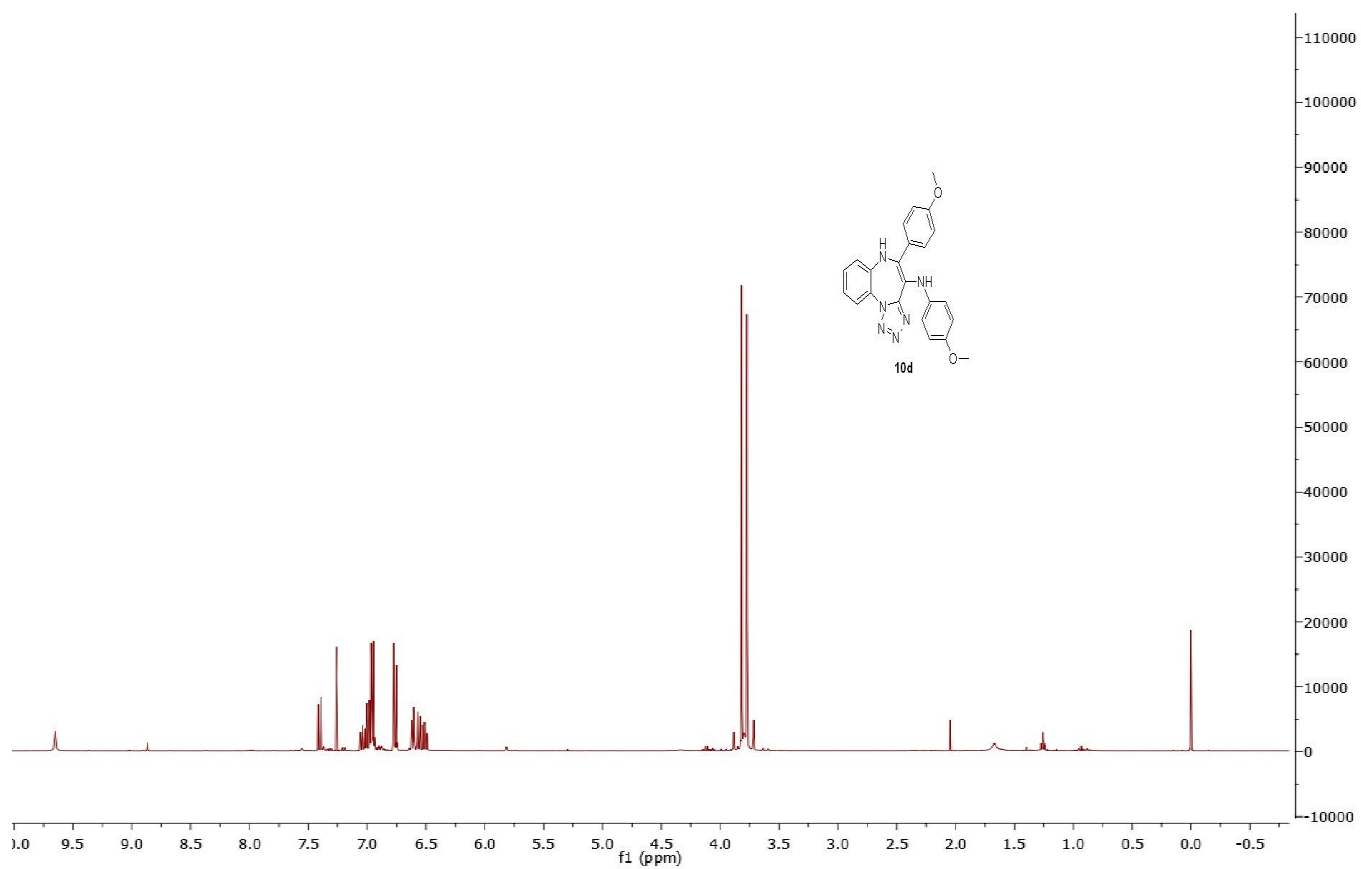

$^{13}\text{C}$  NMR for compound **10d** ( $\text{CDCl}_3$ , 100 MHz)

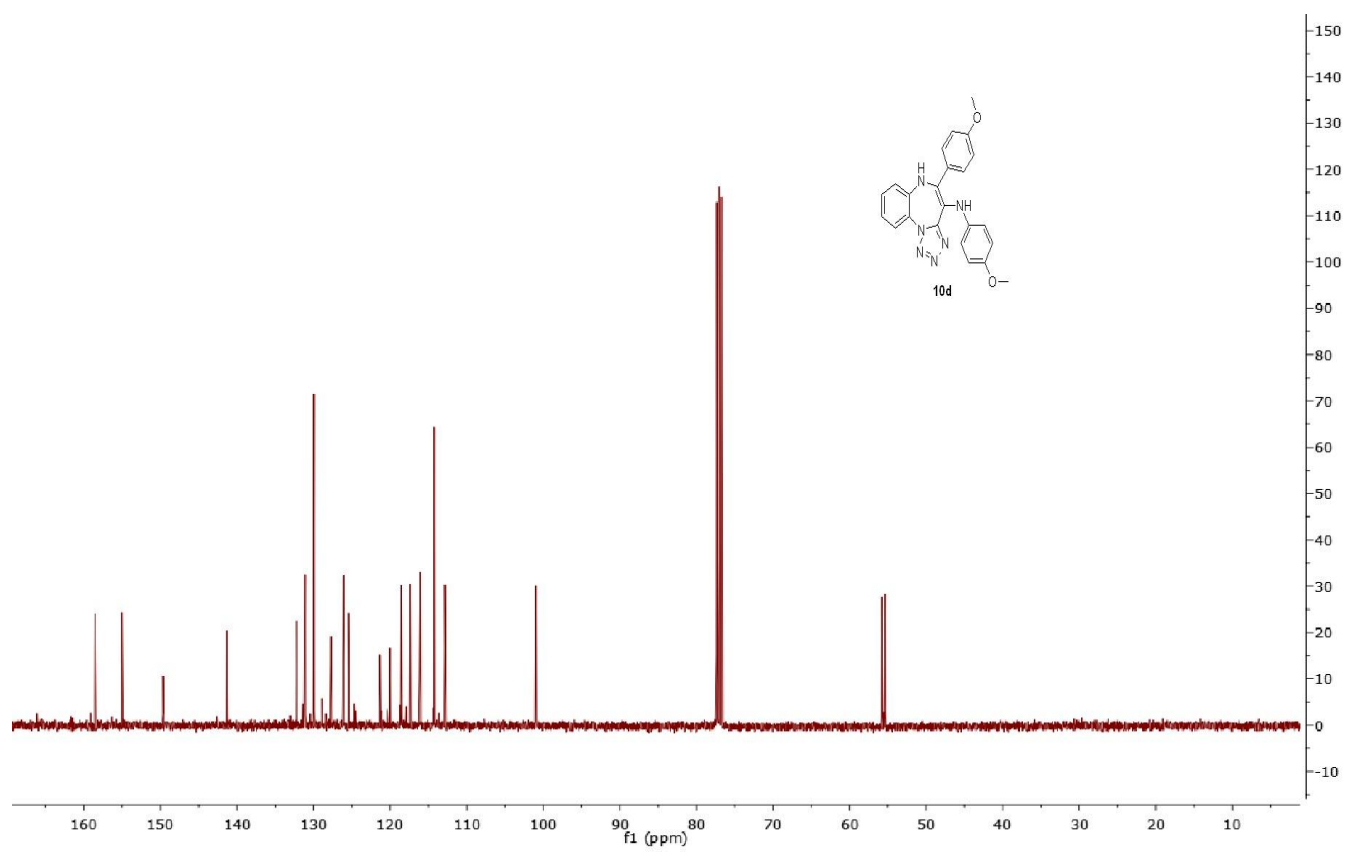

$^1\text{H}$  NMR for compound **10e** ( $\text{CDCl}_3$ , 400 MHz)

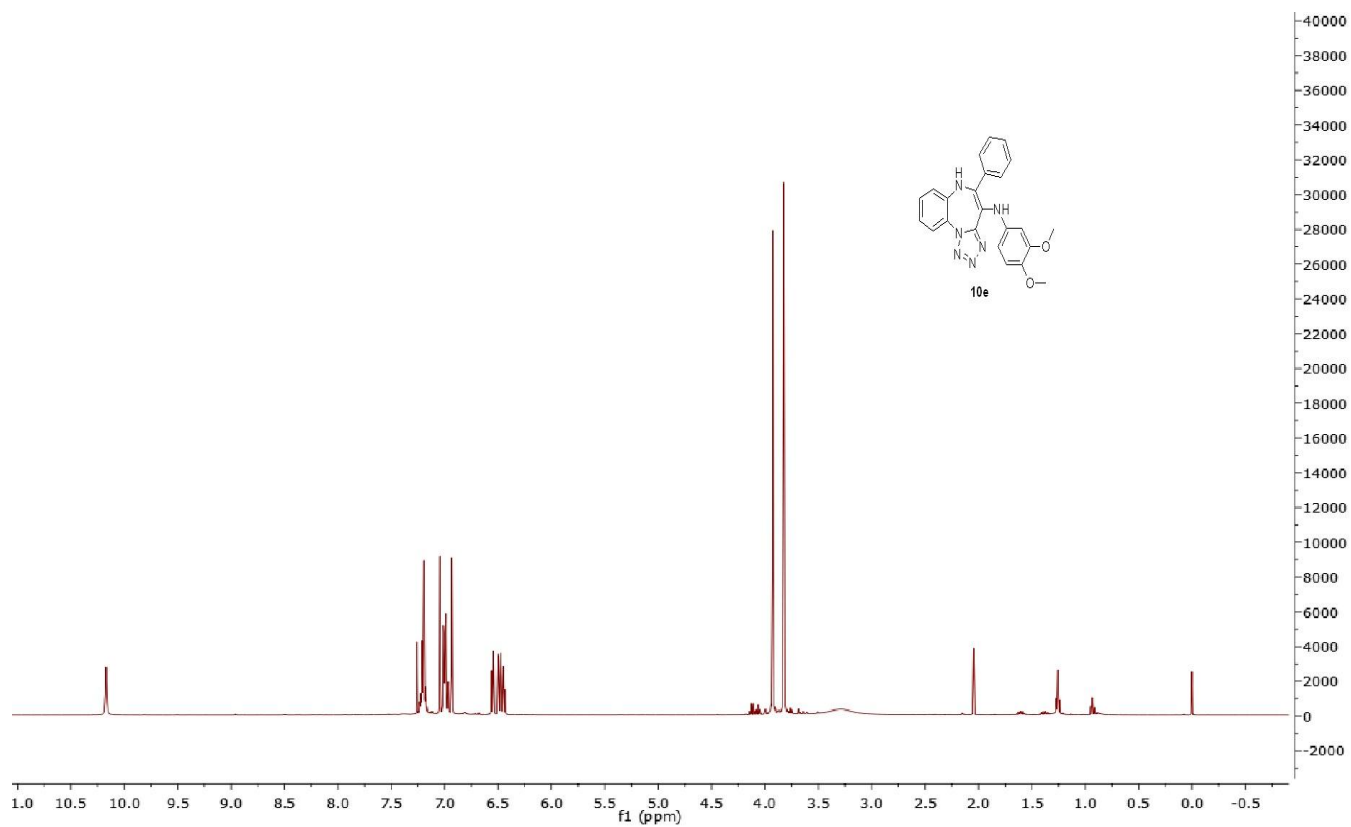

$^{13}\text{C}$  NMR for compound **10e** ( $\text{CDCl}_3$ , 100 MHz)

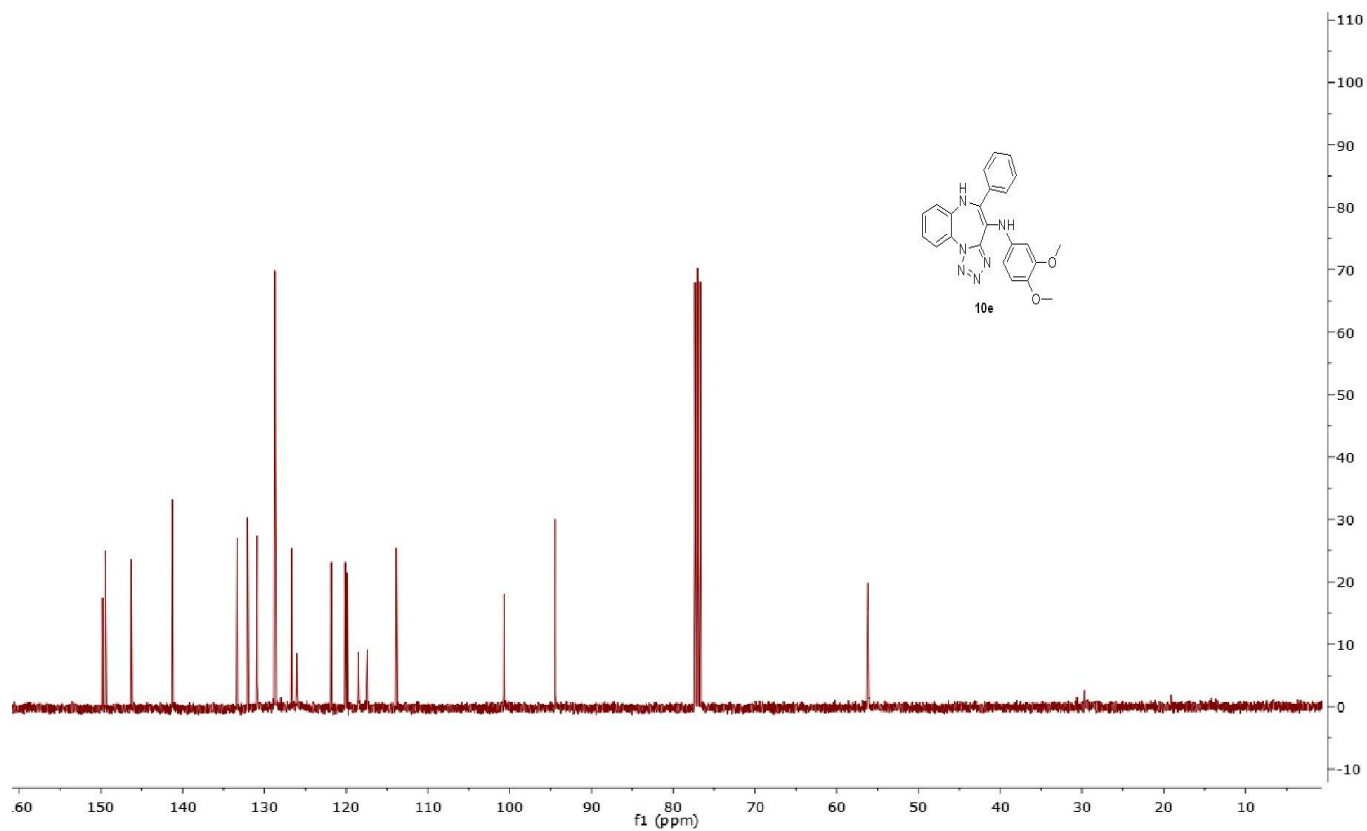

$^1\text{H}$  NMR for compound **11a** ( $\text{CDCl}_3$ , 400 MHz)

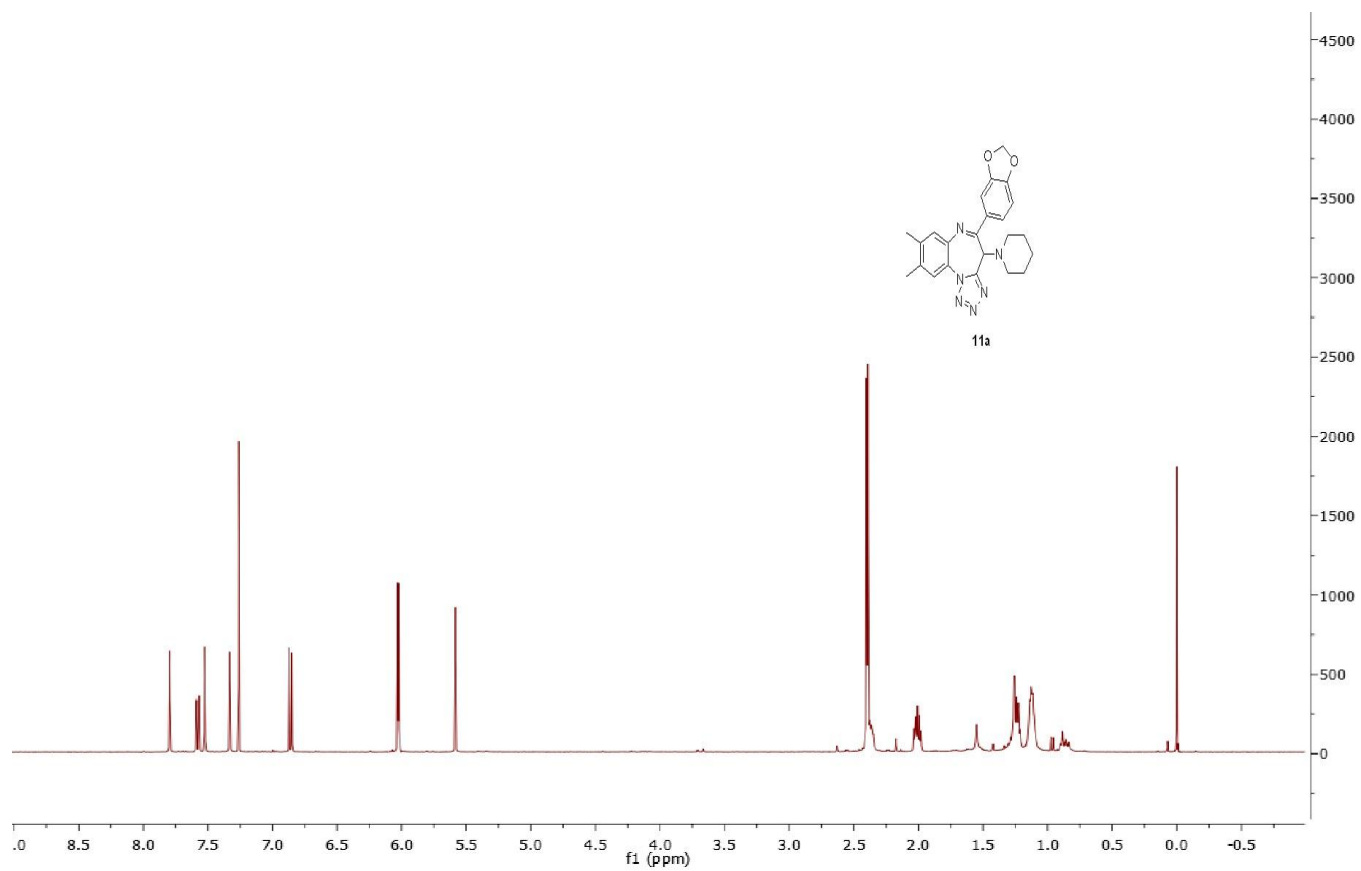

$^{13}\text{C}$  NMR for compound **11a** ( $\text{CDCl}_3$ , 100 MHz)

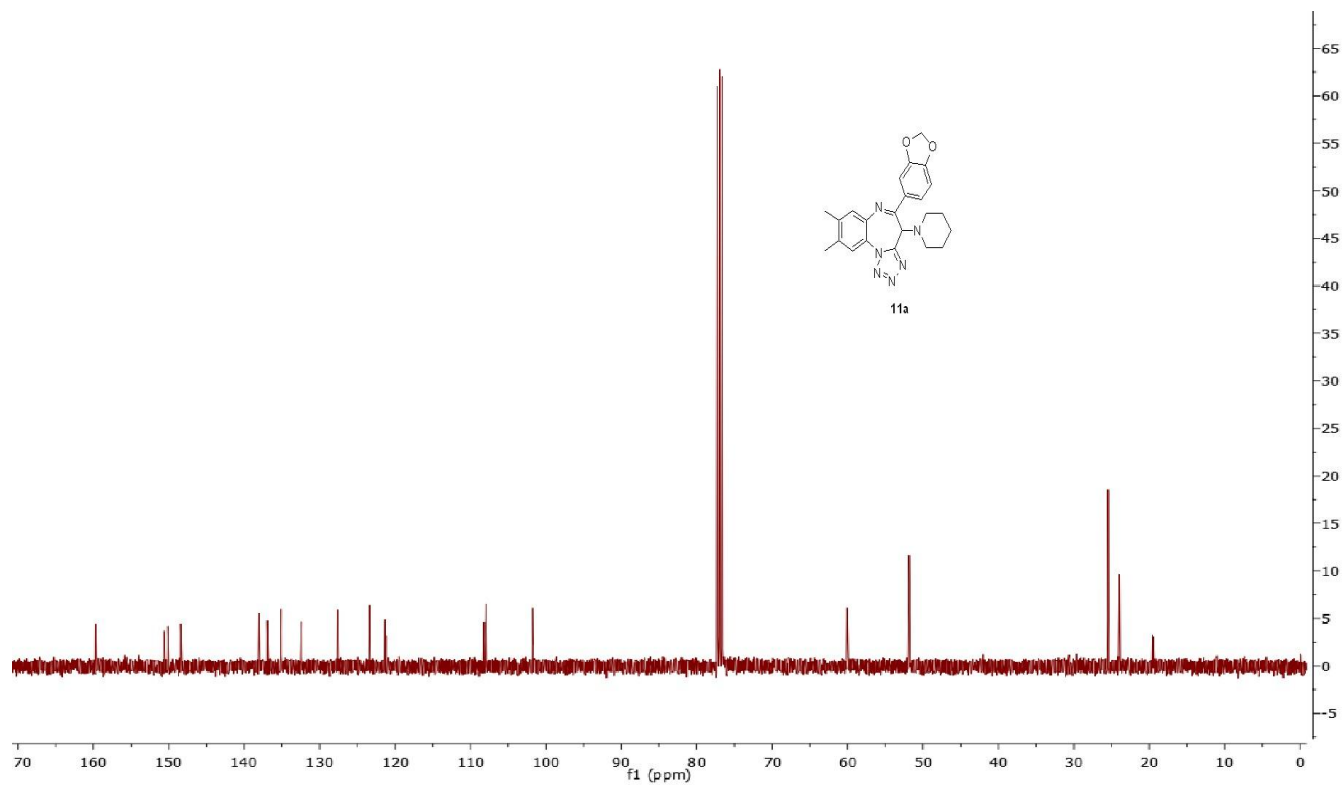

$^1\text{H}$  NMR for compound **11b** ( $\text{CDCl}_3$ , 400 MHz)

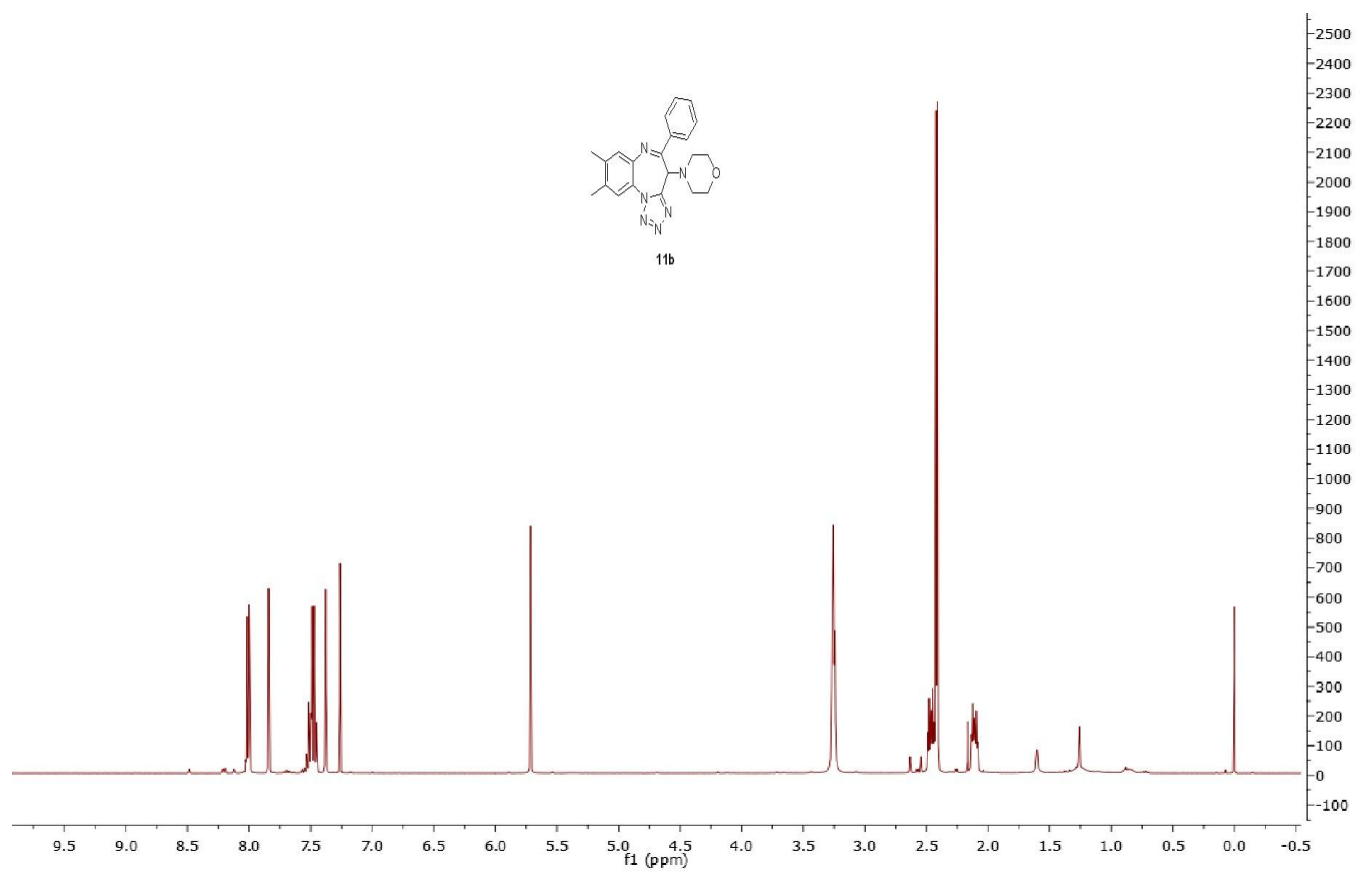



$^{13}\text{C}$  NMR for compound **11b** ( $\text{CDCl}_3$ , 100 MHz)

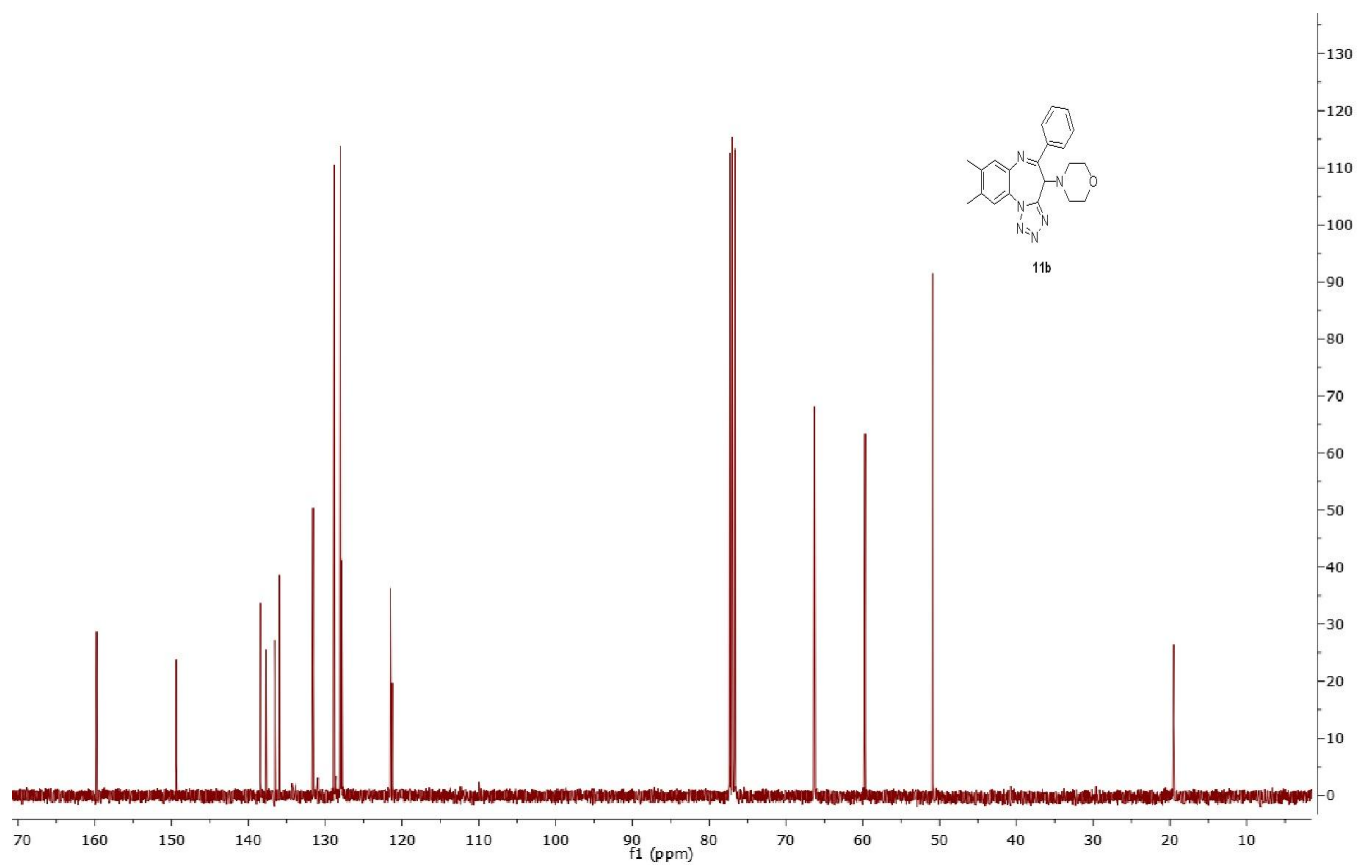

$^1\text{H}$  NMR for compound **11c** ( $\text{CDCl}_3$ , 400 MHz)

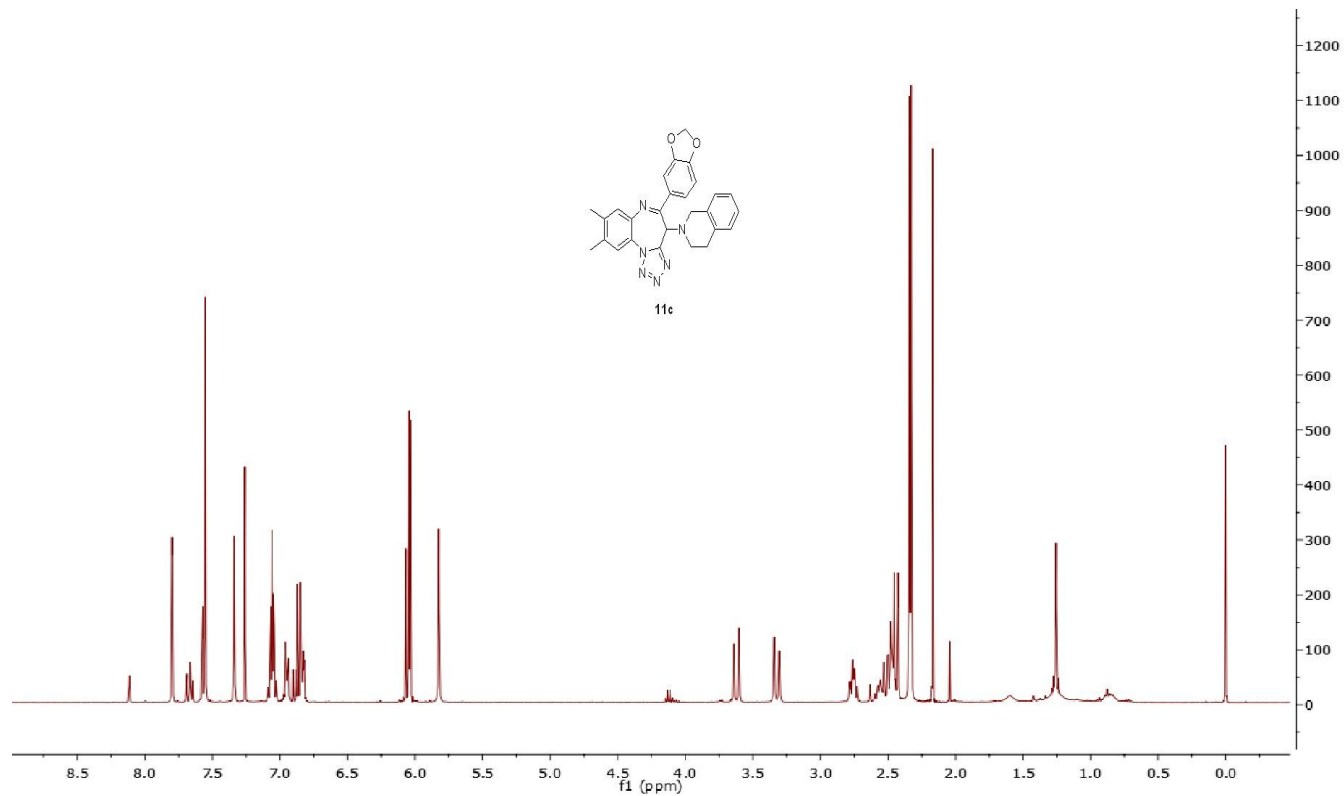

$^{13}\text{C}$  NMR for compound **11c** ( $\text{CDCl}_3$ , 100 MHz)

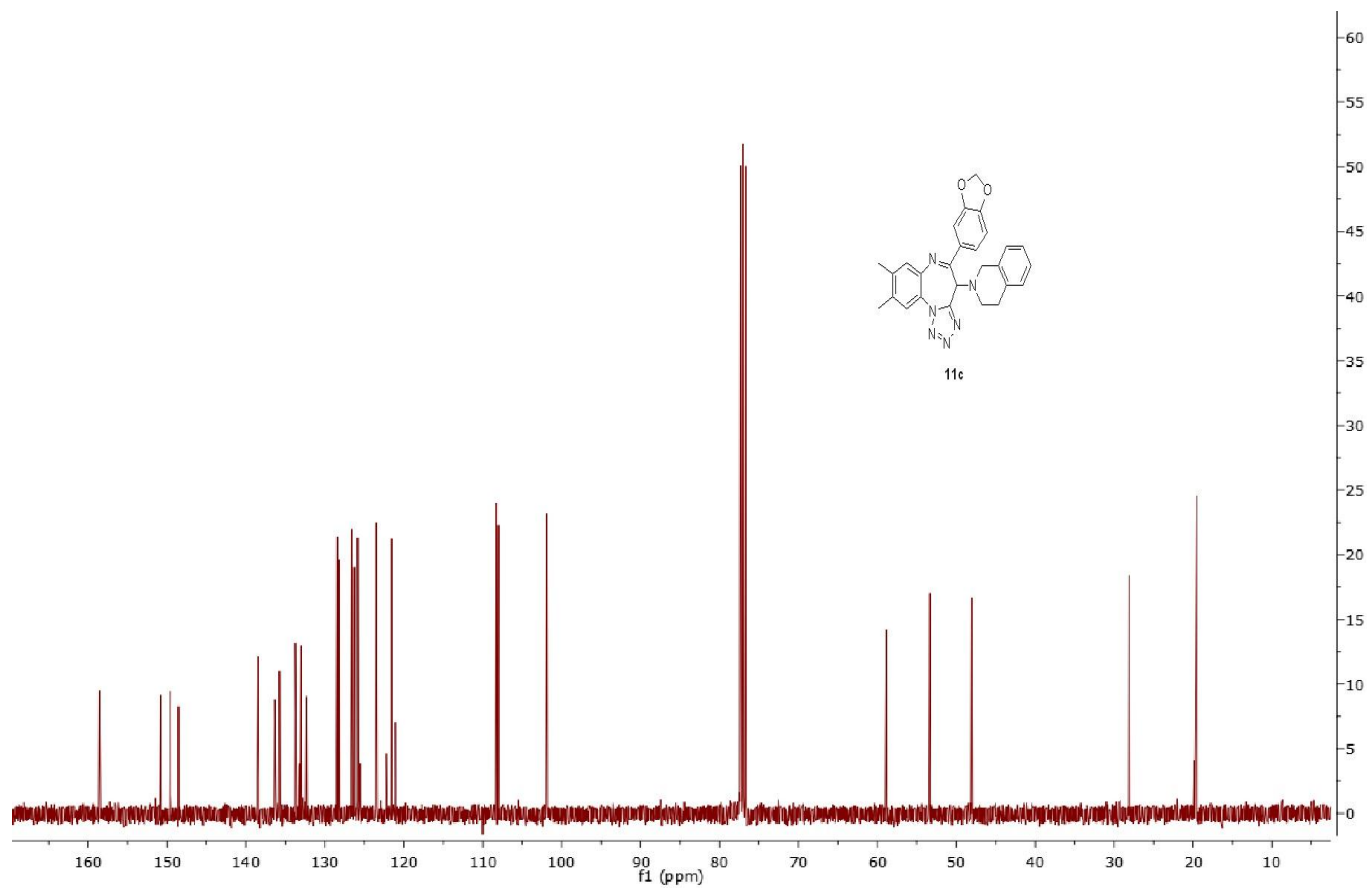

$^1\text{H}$  NMR for compound **11d** ( $\text{CDCl}_3$ , 400 MHz)

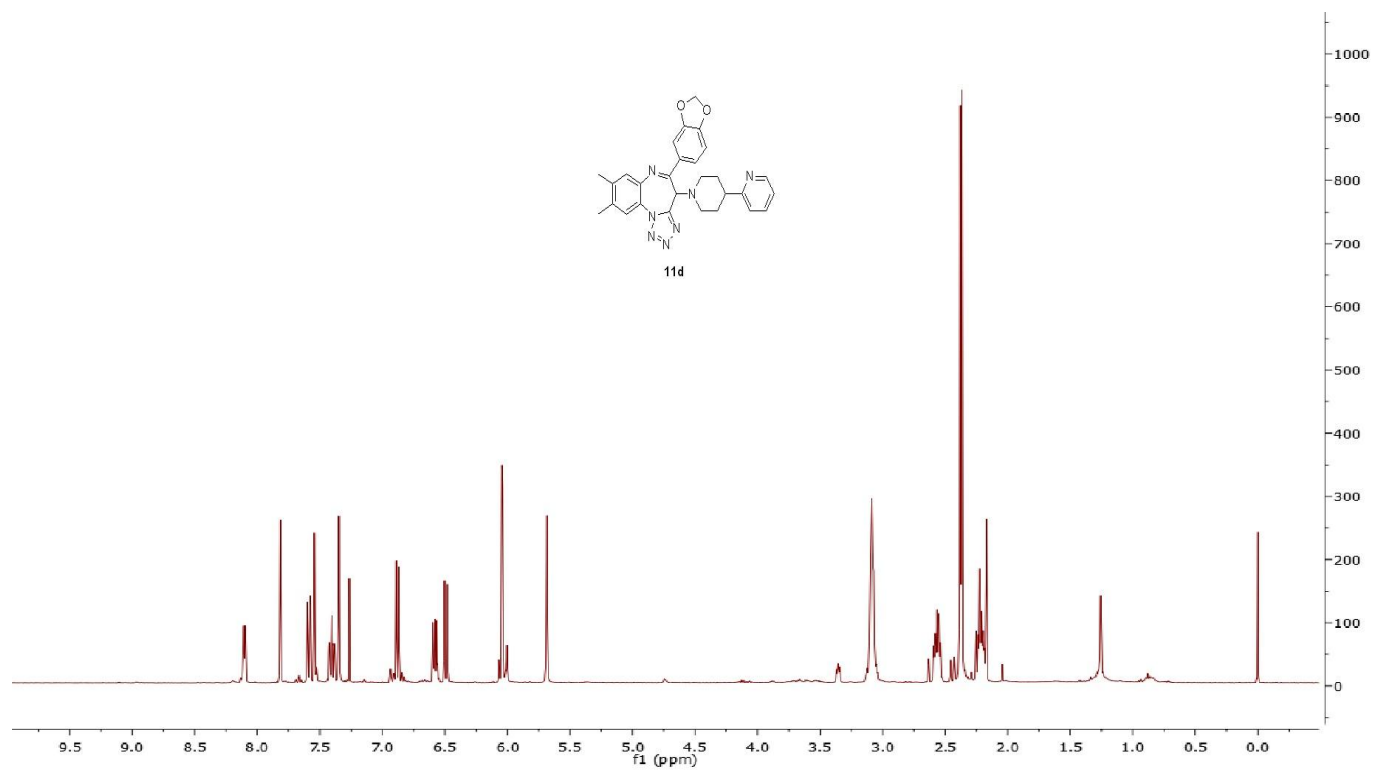

$^{13}\text{C}$  NMR for compound **11d** ( $\text{CDCl}_3$ , 100 MHz)

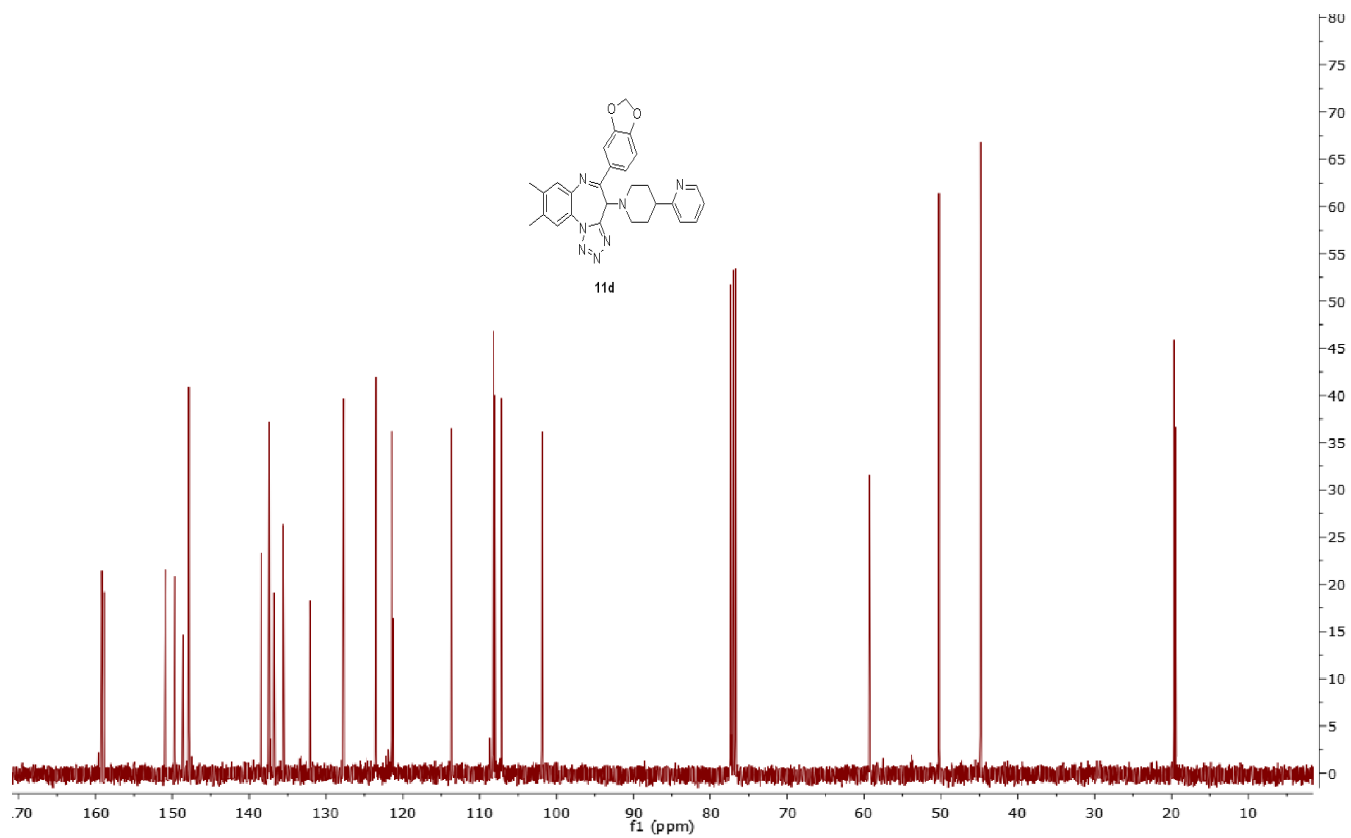

Supplement: NIHMS378670-supplement-01.pdf [file NIHMS378670-supplement-01.pdf]
